# Supplementary material
Source: ML conference proceedings conference paper supplement (https://aclanthology.org/P16-2097)

Bai-110-9

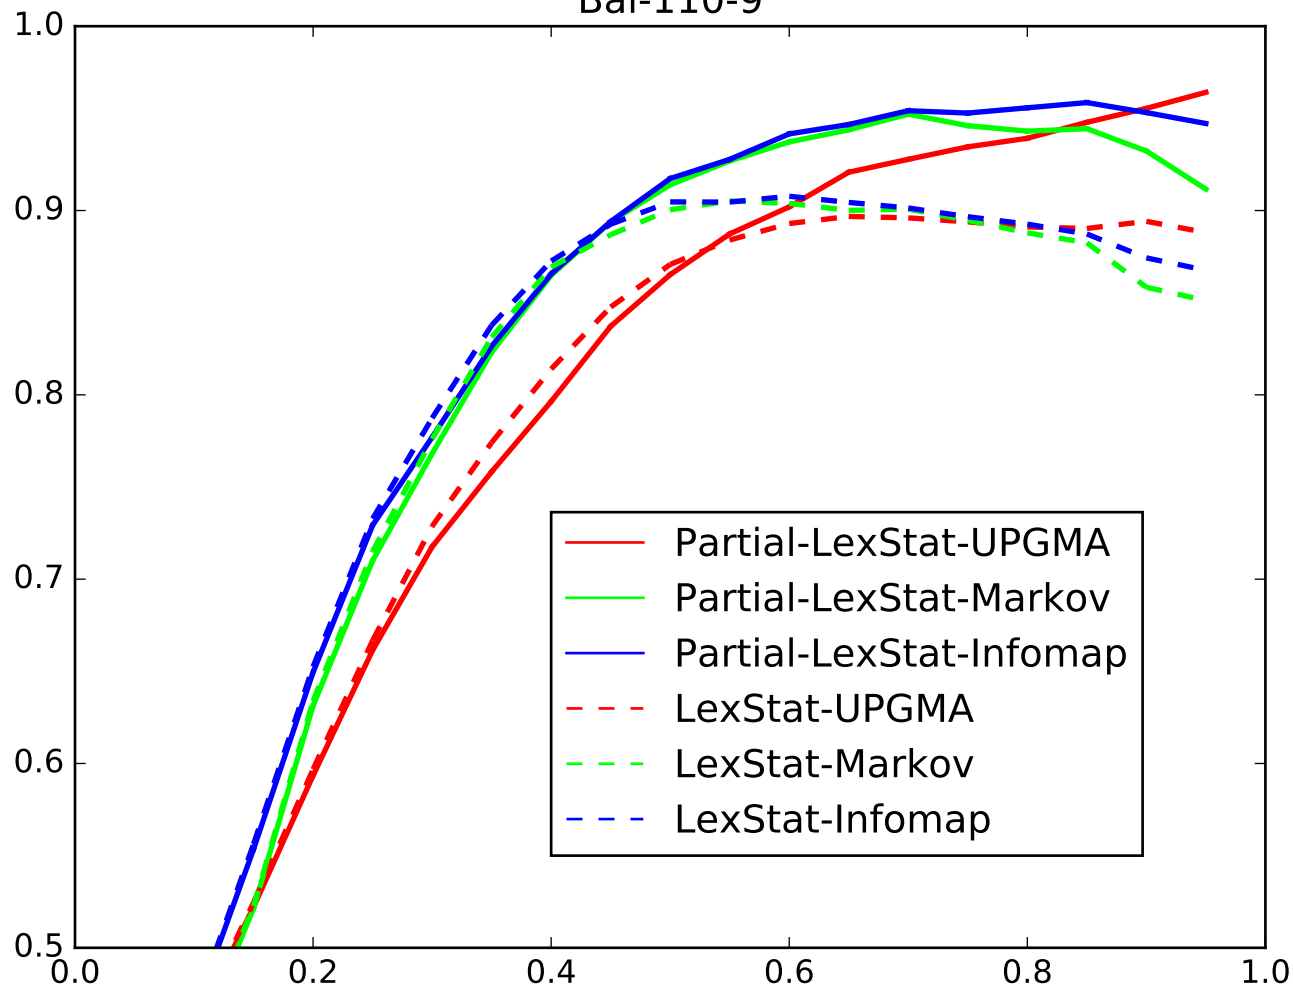

Supplement: Notes [file P16-2097.Notes.zip]

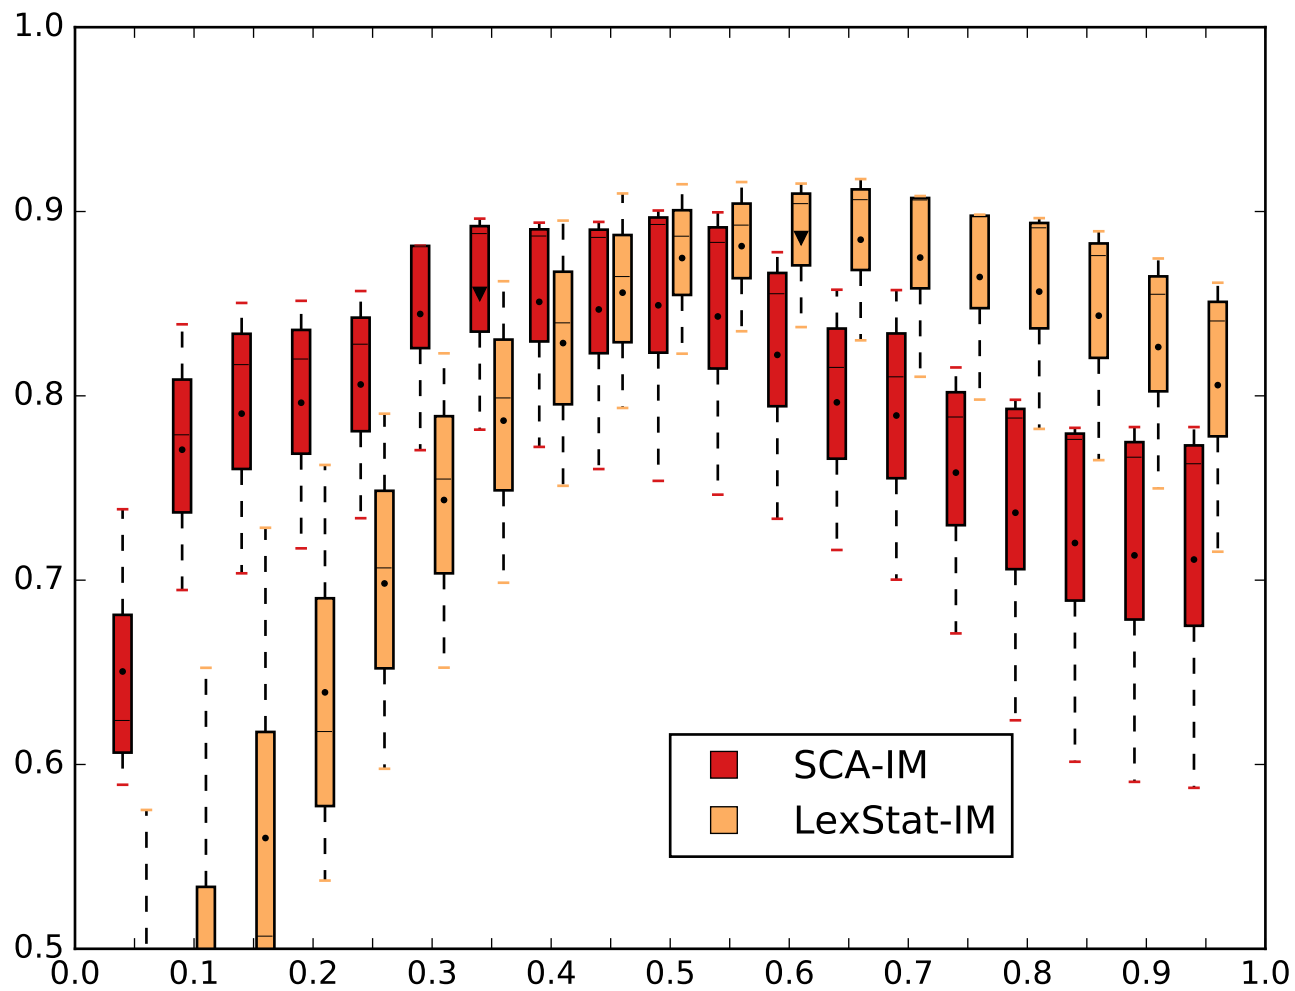

Supplement: Notes [file P16-2097.Notes.zip]

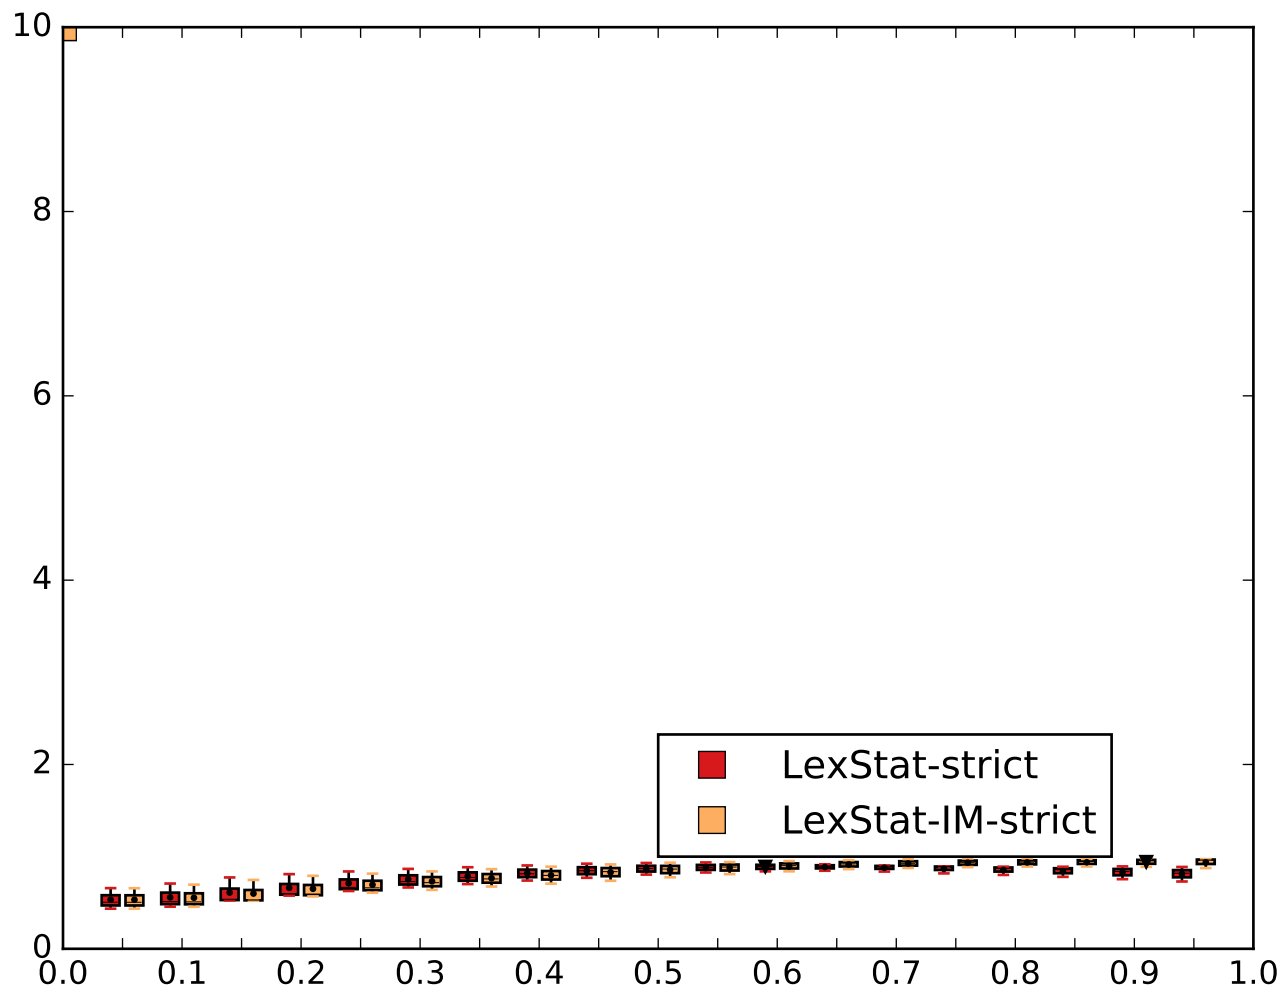

Supplement: Notes [file P16-2097.Notes.zip]

Tujia-109-5

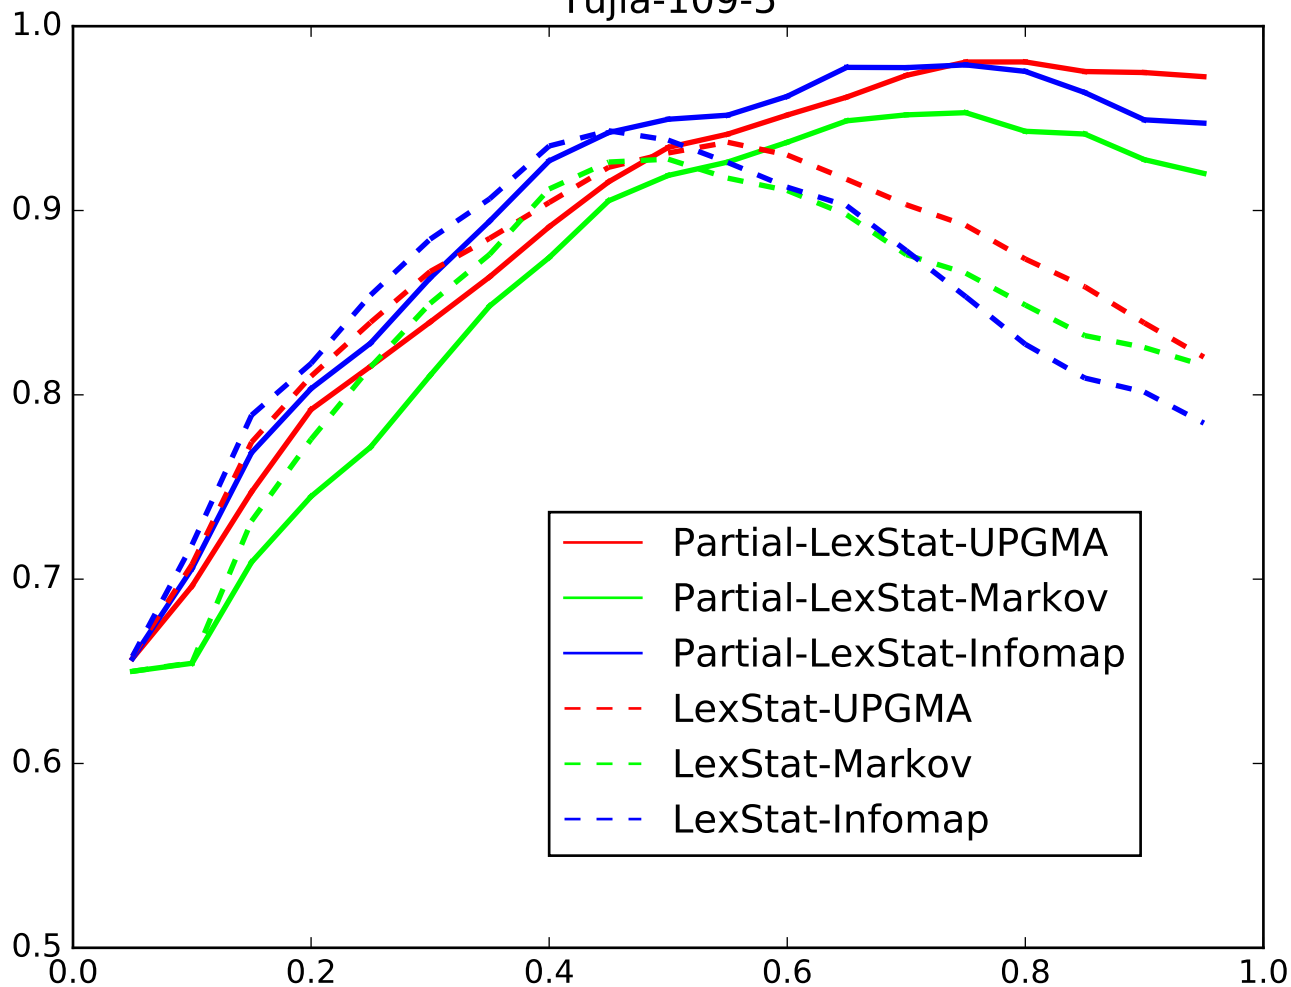

Supplement: Notes [file P16-2097.Notes.zip]

Chinese-180-18

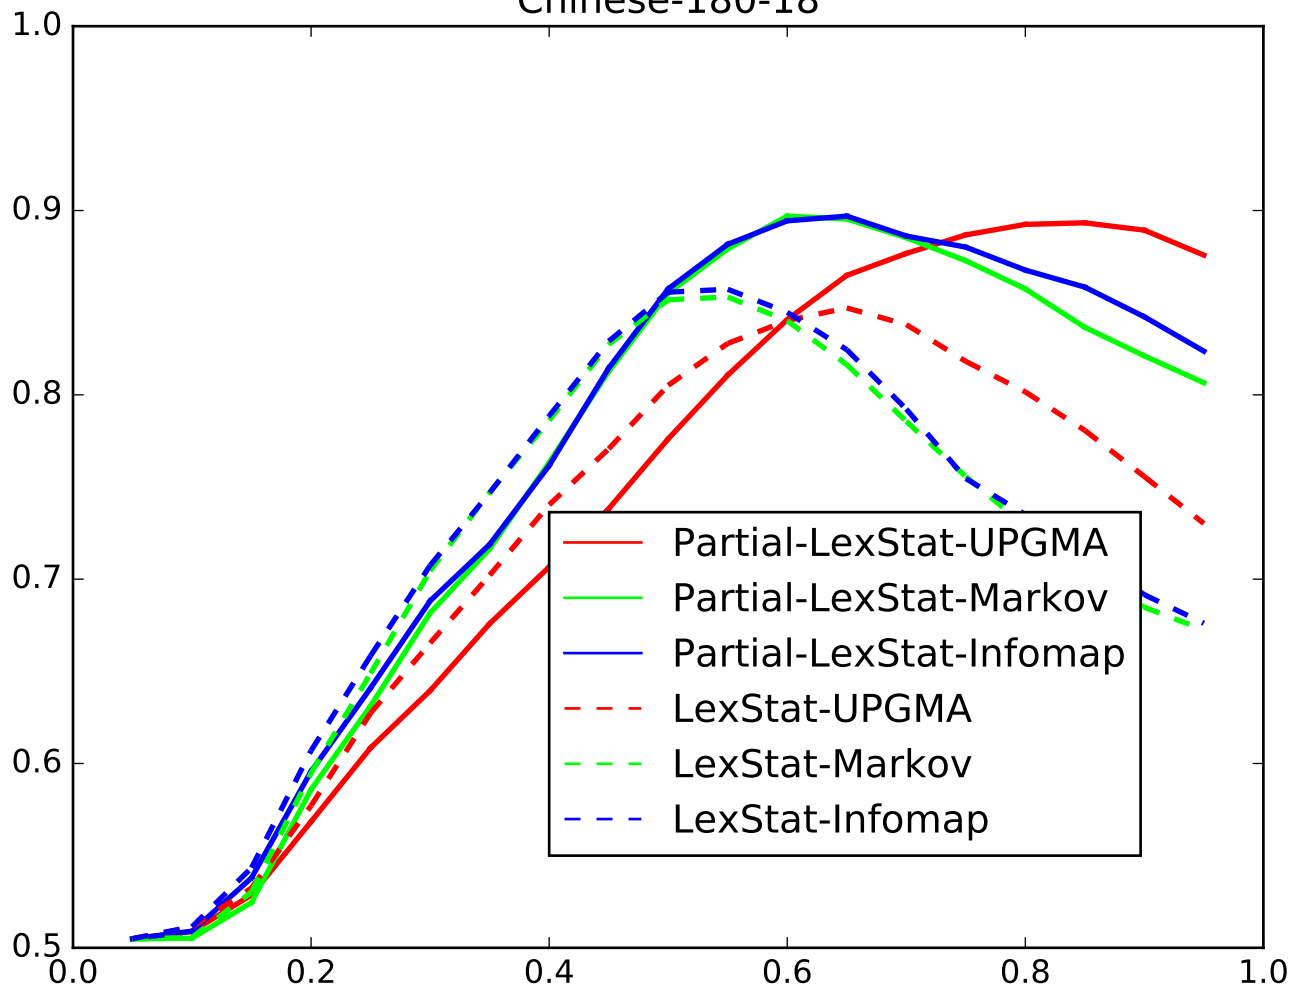

Supplement: Notes [file P16-2097.Notes.zip]
